# Supplementary material for: Unraveling the Role of Polydopamines in Resistive Switching in Al/Polydopamine/Al Structure for Organic Resistive Random-Access Memory
Source: MDPI journal article supplement (doi:10.3390/polym14152995), 2022-07-24
Supplement: s1 [file s1]

# Supplementary Materials: Unraveling the Role of Polydopamines in Resistive Switching in Al/Polydopamine/Al Structure for Organic Resistive Random-Access Memory

*Jonghyeon Yun and Daewon Kim*

## 1. The image of the utilized shadow mask.

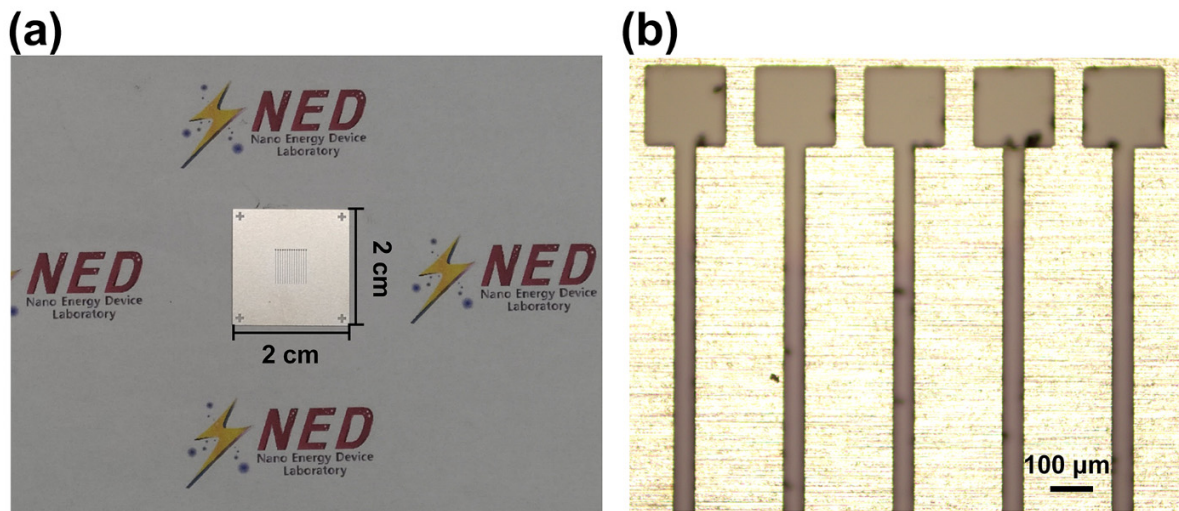

**Figure S1.** (a) Optical camera image of the utilized shadow mask. (b) Optical microscope image of the utilized shadow mask.

2.  $I$ - $V$  characteristics of the Al/PDA/Al structure according to PDA coating time.

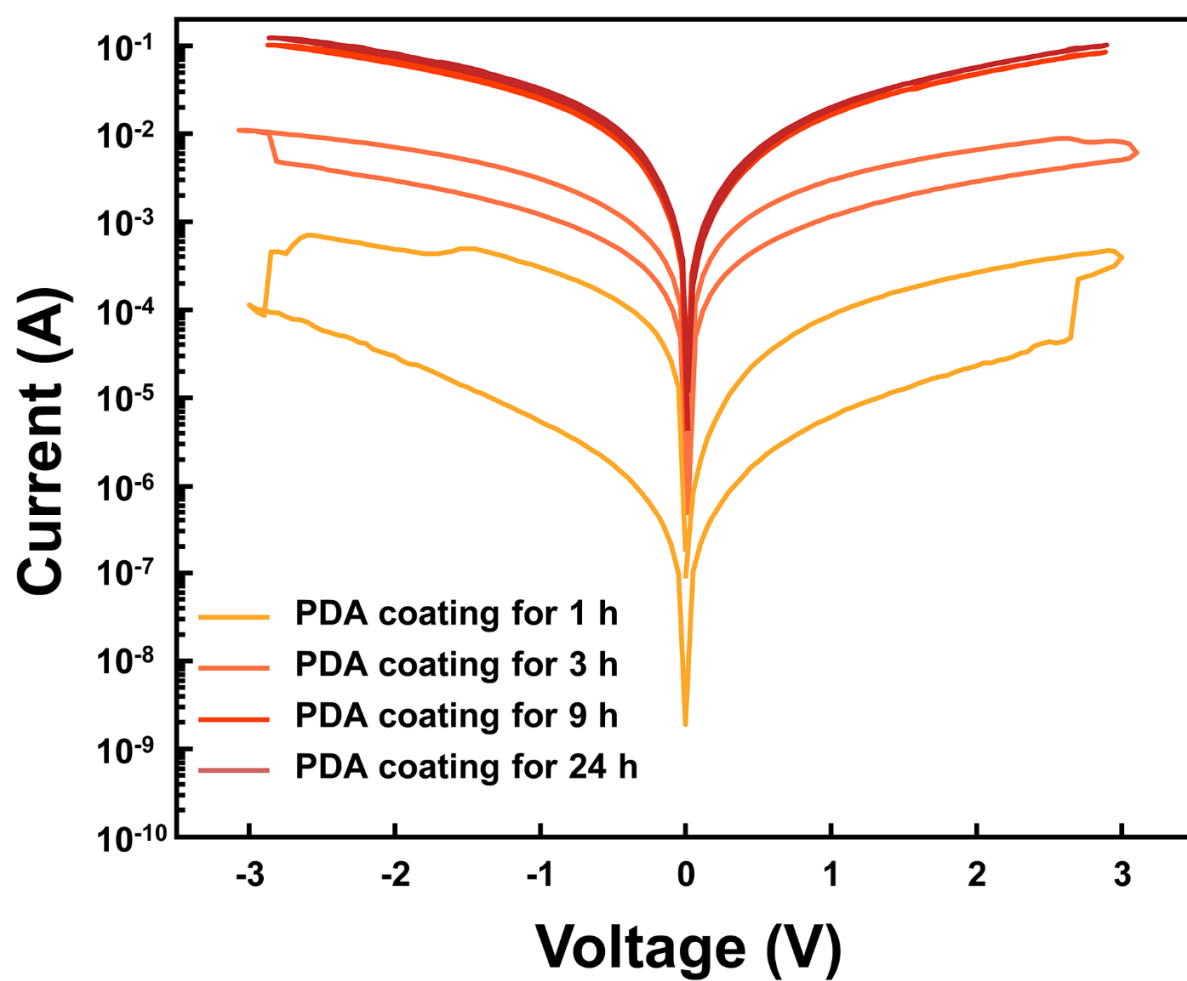

**Figure S2.**  $I$ - $V$  characteristics of the Al/PDA/Al structure showing resistive switching according to PDA coating time.

**3. Thickness of the PDA layer according to PDA coating time.**

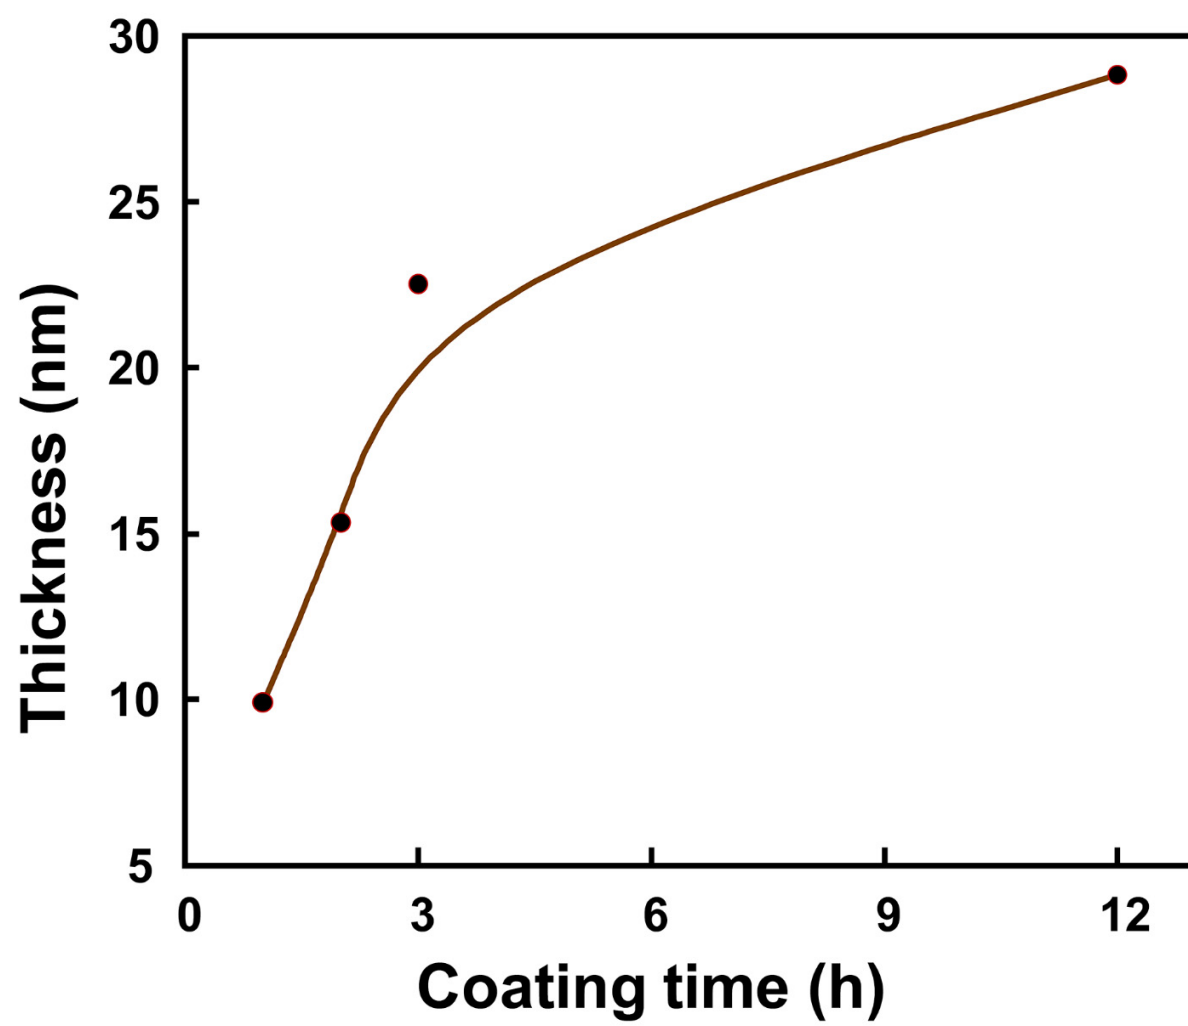

**Figure S3.** Thickness of the PDA layer according to PDA coating time.

4. XPS spectra of the Al and PDA/Al structure coated with a PDA layer coated for 1 h and 2 h.

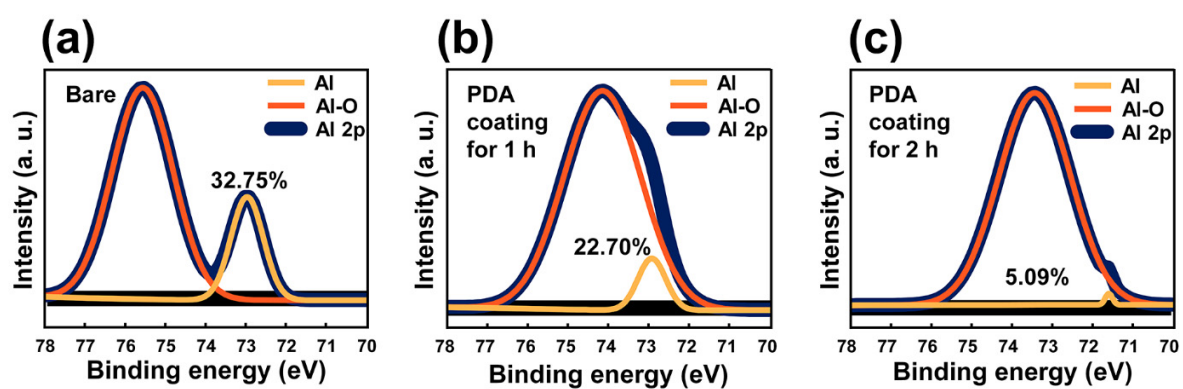

**Figure S4.** XPS spectra of (a) Al 2p in a bare Al electrode and a PDA/Al structure with a PDA layer coated for (b) 1 h and (c) 2 h, respectively.

**5. XPS spectra of the PDA/Al structure according to PDA coating time.**

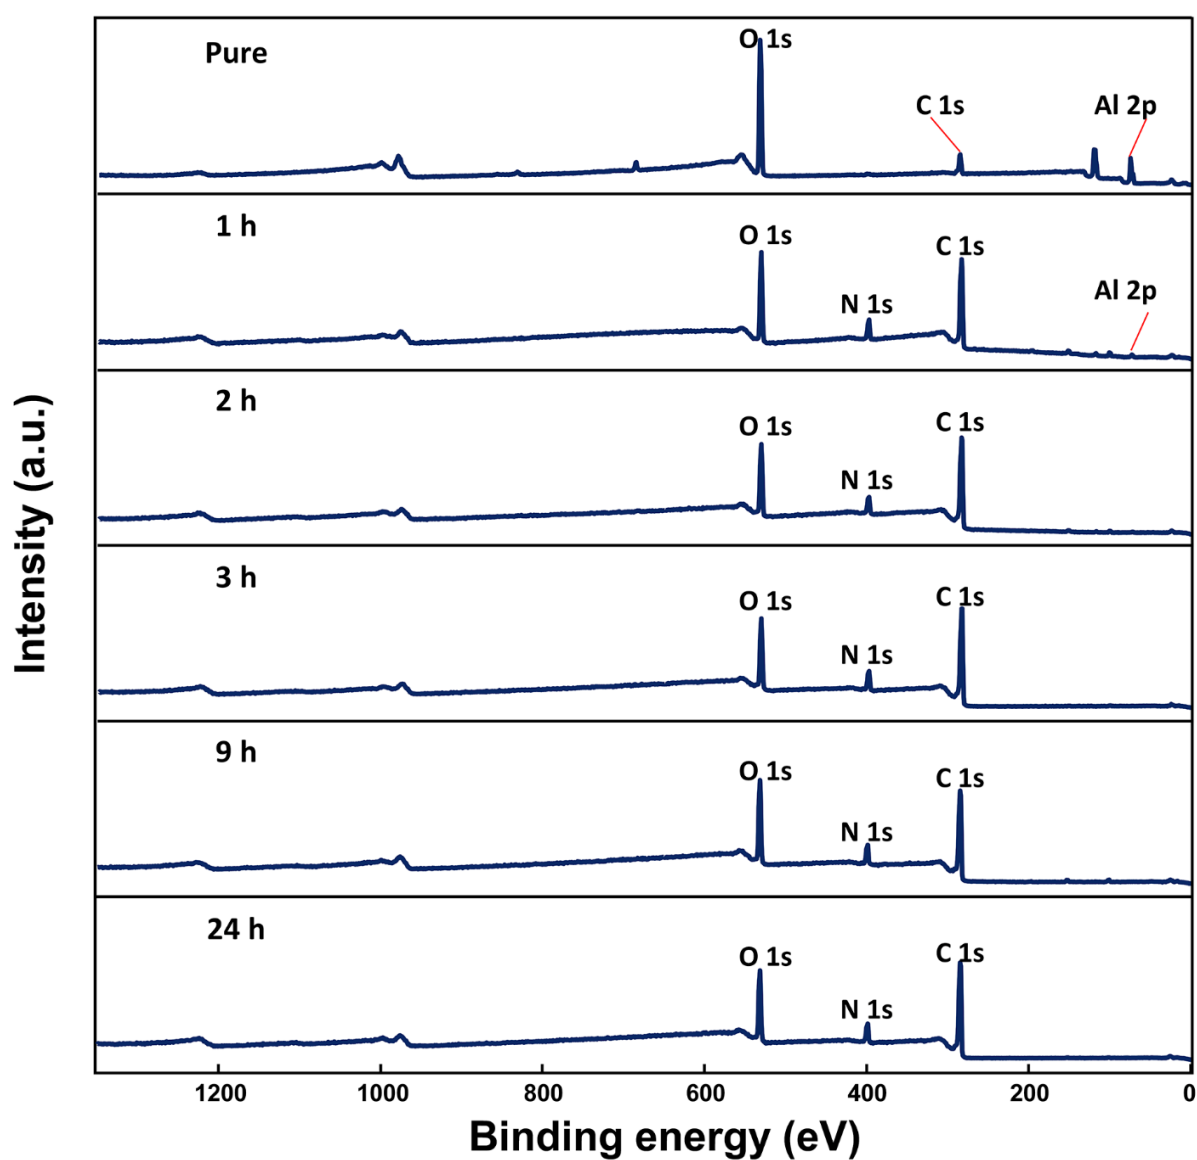

**Figure S5.** XPS spectra of the Al (2p), C (1s), N (1s), and O (1s) in the PDA/Al structure according to PDA coating time.

6. Enlarged XPS spectra of the Al and PDA/Al structure coated with a PDA layer coated for 1 h and 2 h.

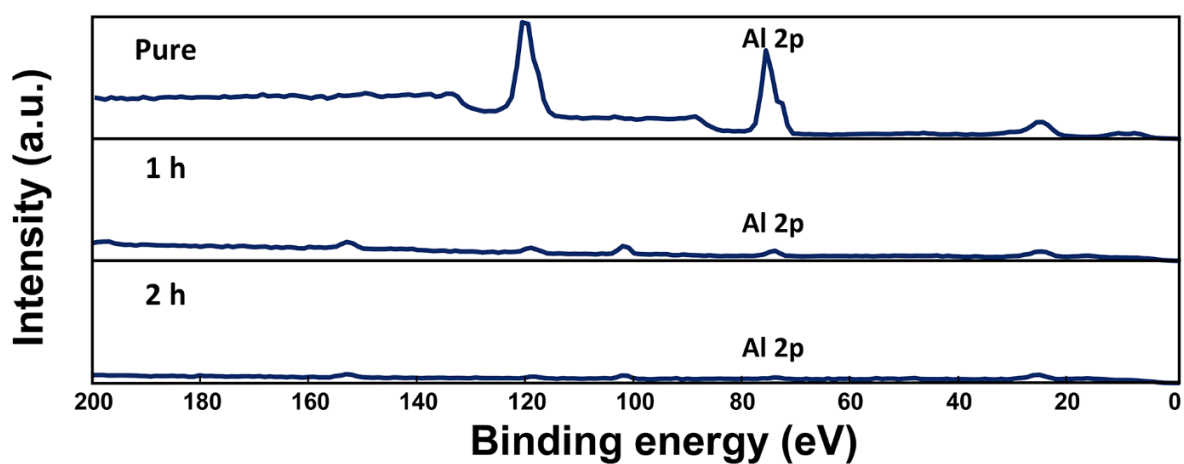

**Figure S6.** Enlarged XPS spectra of the Al (2p) in the PDA/Al structure according to PDA coating time.

## 7. AFM and SEM images of PET substrate-based PDA/Al structure.

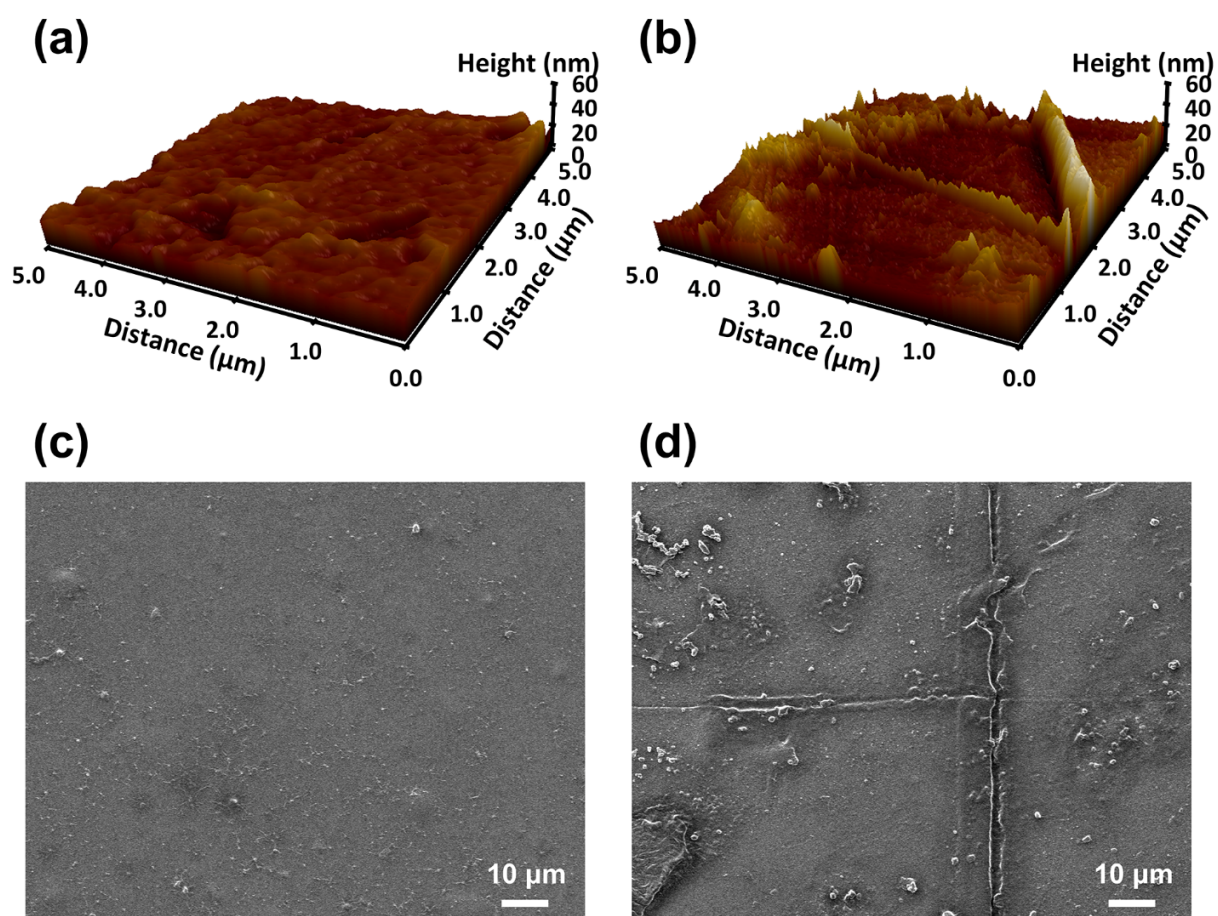

**Figure S7.** AFM images of (a) PET substrate-based PDA/Al structure with flat condition and (b) bending condition (bending angle:  $60^\circ$ ). SEM image of (c) PET substrate-based PDA/Al structure with flat condition and (d) bending condition (bending angle:  $60^\circ$ ).

## 8. Count of resistive switching (RS) and non-RS characteristics

**Table S1.** Count times of RS and non-RS characteristics

| Coating time (h)       | 1     | 2     | 3     | 9     | 24    |
|------------------------|-------|-------|-------|-------|-------|
| RS characteristics     | 102   | 131   | 156   | 45    | 34    |
| Non-RS characteristics | 94    | 65    | 40    | 151   | 162   |
| Total                  | 196   | 196   | 196   | 196   | 196   |
| Yield (%)              | 52.04 | 66.83 | 79.59 | 22.96 | 17.35 |

## 9. Thickness of the PDA layer according to PDA coating time.

**Table S2.** Thickness of the PDA layer according to PDA coating time in SEM image.

| Coating time (h) | Thickness (nm) |
|------------------|----------------|
| 1                | 9.91           |
| 2                | 15.32          |
| 3                | 22.52          |
| 12               | 28.83          |
